# Supplementary material for: Mammalian cell growth dynamics in mitosis
Source: eLife. 2019 May 7;8:e44700. doi: 10.7554/eLife.44700 (PMC6534395; doi:10.7554/eLife.44700)
Supplement: Figure 1—source data 1. [file elife-44700-fig1-data1.xlsx]

## Sheet: L1210 cell mass measurement
Cell #1		Cell #2		Cell #3		Cell #4		Cell #5		Cell #6		Cell #7		Cell #8		Cell #9		Cell #10		Cell #11		Cell #12		Cell #13		Cell #14		Cell #15		Cell #16		Cell #17		Cell #18		Cell #19		Cell #20		Cell #21		Cell #22		Cell #23		Cell #24		Cell #25
Time from M/A (h)	Buoyant mass (pg)	Time from M/A (h)	Buoyant mass (pg)	Time from M/A (h)	Buoyant mass (pg)	Time from M/A (h)	Buoyant mass (pg)	Time from M/A (h)	Buoyant mass (pg)	Time from M/A (h)	Buoyant mass (pg)	Time from M/A (h)	Buoyant mass (pg)	Time from M/A (h)	Buoyant mass (pg)	Time from M/A (h)	Buoyant mass (pg)	Time from M/A (h)	Buoyant mass (pg)	Time from M/A (h)	Buoyant mass (pg)	Time from M/A (h)	Buoyant mass (pg)	Time from M/A (h)	Buoyant mass (pg)	Time from M/A (h)	Buoyant mass (pg)	Time from M/A (h)	Buoyant mass (pg)	Time from M/A (h)	Buoyant mass (pg)	Time from M/A (h)	Buoyant mass (pg)	Time from M/A (h)	Buoyant mass (pg)	Time from M/A (h)	Buoyant mass (pg)	Time from M/A (h)	Buoyant mass (pg)	Time from M/A (h)	Buoyant mass (pg)	Time from M/A (h)	Buoyant mass (pg)	Time from M/A (h)	Buoyant mass (pg)	Time from M/A (h)	Buoyant mass (pg)	Time from M/A (h)	Buoyant mass (pg)
-0.865905	68.9124	-1.49906	65.3513	-1.50622	70.1797	-1.50741	77.5531	-1.48841	76.2303	-1.4866	67.2174	-1.51204	70.6424	-1.48801	69.0144	-1.50564	87.2436	-1.50047	85.9898	-1.51209	79.623	-1.50695	80.1502	-1.50512	74.1153	-1.50939	74.7304	-1.51079	72.8594	-1.5104	60.3209	-1.50092	67.7514	-1.48917	67.2783	-1.50573	64.2316	-1.48904	71.358	-1.4981	77.2301	-1.4942	76.0831	-1.49374	82.3134	-1.50031	77.624	-1.50403	74.5559
-0.844029	69.0258	-1.48109	65.4342	-1.48592	70.2493	-1.48919	77.6129	-1.46285	76.347	-1.45635	67.3438	-1.48067	70.8542	-1.45783	69.1632	-1.47394	87.3973	-1.46989	86.1938	-1.48328	79.7707	-1.47484	80.2792	-1.47205	74.3349	-1.4782	74.9931	-1.48592	72.9804	-1.48884	60.4068	-1.47915	67.909	-1.46871	67.3352	-1.48344	64.3544	-1.46802	71.4275	-1.47787	77.3352	-1.4734	76.128	-1.47394	82.3823	-1.48057	77.8108	-1.48424	74.7176
-0.82658	69.1066	-1.46116	65.5007	-1.46571	70.366	-1.4704	77.6381	-1.4383	76.4724	-1.42533	67.4699	-1.44868	71.1237	-1.42724	69.2687	-1.44305	87.5615	-1.43941	86.3659	-1.45034	79.9769	-1.44683	80.4052	-1.43982	74.5335	-1.44614	74.9389	-1.46457	73.0375	-1.46493	60.5219	-1.45597	67.9588	-1.44576	67.4769	-1.46135	64.4745	-1.44625	71.5927	-1.45699	77.4405	-1.45223	76.2873	-1.454	82.4684	-1.46068	77.865	-1.46532	74.8318
-0.804355	69.2524	-1.44335	65.5956	-1.44551	70.4593	-1.45174	77.6938	-1.41276	76.6278	-1.39592	67.5691	-1.41787	71.3157	-1.39706	69.428	-1.41189	87.716	-1.40878	86.5911	-1.42153	80.1015	-1.41432	80.5275	-1.40683	74.6891	-1.41531	75.5708	-1.43993	73.174	-1.443	60.5724	-1.4344	68.1297	-1.42535	67.6231	-1.43918	64.6061	-1.42498	71.717	-1.43647	77.5903	-1.43113	76.4282	-1.43442	82.6283	-1.44127	77.9798	-1.44548	74.9121
-0.786938	69.3212	-1.4237	65.7101	-1.42532	70.5656	-1.43332	77.7395	-1.38847	76.7845	-1.36465	67.7258	-1.38566	71.4589	-1.3664	69.5539	-1.38098	87.9022	-1.37846	86.7386	-1.38814	80.2802	-1.38617	80.6041	-1.37458	74.8519	-1.38335	75.6701	-1.41776	73.2554	-1.4185	60.6791	-1.41078	68.3091	-1.40282	67.7544	-1.41735	64.7463	-1.40361	71.777	-1.41518	77.717	-1.41022	76.5022	-1.41446	82.7838	-1.42161	78.0648	-1.4264	75.0339
-0.765233	69.4487	-1.40573	65.7927	-1.40517	70.6975	-1.41489	77.7723	-1.36313	76.8636	-1.33518	67.89	-1.35473	71.697	-1.33653	69.7148	-1.34918	88.049	-1.34787	86.8788	-1.35912	80.4853	-1.35368	80.6365	-1.34125	75.0638	-1.35221	76.0978	-1.39368	73.3663	-1.39635	60.7455	-1.38945	68.4145	-1.3821	67.8358	-1.39526	64.8647	-1.38257	71.9425	-1.39468	77.8481	-1.3884	76.6298	-1.39412	82.8939	-1.40226	78.2378	-1.40652	75.1069
-0.748137	69.5524	-1.38601	65.9201	-1.38518	70.759	-1.39632	77.8146	-1.33862	77.0358	-1.30418	68.002	-1.32274	71.9161	-1.30593	69.8296	-1.31752	88.2305	-1.31731	87.0762	-1.32597	80.5999	-1.32585	80.8153	-1.30878	75.2131	-1.32005	76.1241	-1.3708	73.4234	-1.37233	60.8199	-1.36591	68.5107	-1.35927	67.8994	-1.37325	64.9293	-1.36161	72.1368	-1.37379	77.9533	-1.36721	76.7537	-1.37419	82.9823	-1.3819	78.3235	-1.3877	75.2571
-0.726199	69.674	-1.3678	65.9855	-1.3651	70.8646	-1.3778	77.8622	-1.313	77.1769	-1.2748	68.1795	-1.29125	72.1022	-1.27584	69.9922	-1.28543	88.3903	-1.28663	87.2423	-1.29709	80.7895	-1.29354	80.8019	-1.27573	75.4264	-1.28887	76.2319	-1.34623	73.5465	-1.35074	60.8998	-1.34433	68.6235	-1.33854	68.0758	-1.35111	65.0406	-1.34071	72.1626	-1.35326	78.0963	-1.34545	76.8899	-1.35427	83.0942	-1.36209	78.3912	-1.36805	75.3269
-0.70506	69.8028	-1.34805	66.0962	-1.34471	70.9284	-1.3595	77.9464	-1.28814	77.3404	-1.24377	68.2711	-1.25927	72.33	-1.24517	70.1167	-1.2544	88.5347	-1.25611	87.3967	-1.26399	80.8934	-1.26563	80.9901	-1.24301	75.6422	-1.25716	76.6515	-1.32341	73.6349	-1.32689	60.9664	-1.32077	68.7737	-1.31577	68.1144	-1.32893	65.1494	-1.31896	72.3541	-1.33225	78.224	-1.3245	76.9624	-1.33408	83.1812	-1.34258	78.5047	-1.34905	75.4946
-0.683944	69.917	-1.33002	66.1589	-1.32438	71.0659	-1.34122	77.9321	-1.26282	77.4462	-1.2145	68.4437	-1.2285	72.5012	-1.21521	70.2621	-1.22266	88.7128	-1.22558	87.6035	-1.23497	81.0367	-1.23341	81.0447	-1.20963	75.7985	-1.22638	76.8334	-1.29861	73.7032	-1.30536	61.0405	-1.29901	68.9483	-1.29556	68.3607	-1.3066	65.3514	-1.29776	72.4335	-1.31192	78.3305	-1.28241	77.1615	-1.31444	83.3868	-1.32285	78.6541	-1.32965	75.5487
-0.663096	70.0183	-1.31004	66.2964	-1.3043	71.1319	-1.32291	77.9785	-1.23753	77.6	-1.18321	68.539	-1.19652	72.7283	-1.18446	70.378	-1.19118	88.8537	-1.19518	87.7764	-1.20175	81.1246	-1.20552	81.1709	-1.17791	76.0189	-1.19417	77.1656	-1.27591	73.8369	-1.28135	61.162	-1.27578	69.0101	-1.27276	68.3254	-1.28473	65.3664	-1.27601	72.6065	-1.29068	78.4439	-1.26129	77.273	-1.29478	83.4287	-1.30302	78.7619	-1.31066	75.73
-0.641895	70.1844	-1.29203	66.3994	-1.28411	71.2555	-1.30443	78.0616	-1.2128	77.724	-1.1533	68.6797	-1.16548	72.9386	-1.15455	70.5725	-1.15967	89.0204	-1.16427	87.9828	-1.17282	81.3023	-1.17341	81.2258	-1.14485	76.1879	-1.16287	77.5795	-1.25148	73.8991	-1.25971	61.2506	-1.25478	69.1647	-1.25175	68.4949	-1.26228	65.5122	-1.25494	72.7309	-1.26972	78.5788	-1.24027	77.3498	-1.27524	83.6129	-1.28318	78.8997	-1.29105	75.8019
-0.620555	70.2893	-1.27249	66.4846	-1.26434	71.3181	-1.28611	78.1198	-1.18827	77.8197	-1.12198	68.8211	-1.13375	73.1264	-1.12395	70.6155	-1.12898	89.1974	-1.134	88.129	-1.13984	81.3714	-1.14541	81.3135	-1.11179	76.3836	-1.13098	77.405	-1.22882	74.0341	-1.23529	61.3008	-1.23128	69.3264	-1.22927	68.648	-1.24056	65.5726	-1.2327	72.9016	-1.24885	78.6678	-1.219	77.4915	-1.25537	83.6235	-1.26313	78.8995	-1.27207	75.9051
-0.59906	70.4222	-1.25434	66.5511	-1.24414	71.4587	-1.26757	78.1402	-1.16342	78.0061	-1.09231	69.0009	-1.10279	73.3082	-1.09392	70.8023	-1.09711	89.3286	-1.10322	88.314	-1.11075	81.4473	-1.11301	81.3586	-1.0788	76.6101	-1.10059	77.7332	-1.20405	74.1587	-1.21389	61.408	-1.20942	69.442	-1.20851	68.6732	-1.21816	65.7421	-1.21152	73.0145	-1.22839	78.7882	-1.198	77.5715	-1.23486	83.7794	-1.24343	79.1238	-1.2521	75.9709
-0.578487	70.5564	-1.23495	66.6515	-1.22398	71.5636	-1.24954	78.1817	-1.13889	78.1632	-1.06148	69.1047	-1.07049	73.5533	-1.06336	70.9791	-1.06551	89.4658	-1.07269	88.5075	-1.0777	81.536	-1.08512	81.4122	-1.0469	76.7898	-1.06902	77.9786	-1.18139	74.2574	-1.19038	61.4689	-1.18613	69.5519	-1.18634	68.888	-1.19624	65.7565	-1.18956	73.1218	-1.20764	79.0008	-1.17686	77.6424	-1.21455	83.8526	-1.22312	79.2246	-1.2334	76.1646
-0.557304	70.6523	-1.21699	66.7582	-1.20393	71.628	-1.23103	78.224	-1.11371	78.2633	-1.03192	69.2617	-1.0397	73.7237	-1.03312	71.0815	-1.03351	89.641	-1.04236	88.6985	-1.04891	81.6284	-1.05277	81.5072	-1.01344	76.983	-1.03791	78.0972	-1.15623	74.3567	-1.16881	61.5558	-1.16463	69.6774	-1.16545	68.9608	-1.17388	65.9405	-1.16834	73.2334	-1.18735	79.1355	-1.15518	77.7224	-1.19519	83.9818	-1.20323	79.3161	-1.2136	76.2024
-0.535468	70.7985	-1.19736	66.8566	-1.18375	71.7197	-1.21276	78.2767	-1.08939	78.3957	-1.00076	69.3974	-1.00782	73.9529	-1.00266	71.1834	-1.0029	89.8041	-1.01202	88.8534	-1.01577	81.7474	-1.02487	81.5245	-0.981626	77.1822	-1.00611	78.6007	-1.13268	74.4699	-1.14513	61.648	-1.14137	69.8103	-1.14322	69.1246	-1.15178	66.0821	-1.1471	73.4435	-1.1663	79.202	-1.13365	77.8668	-1.17475	84.1044	-1.18351	79.387	-1.1945	76.3595
-0.514008	70.9376	-1.17928	66.952	-1.16348	71.8691	-1.19445	78.2529	-1.06383	78.56	-0.970984	69.554	-0.977192	74.1033	-0.972716	71.3041	-0.971566	89.9361	-0.981425	89.0264	-0.986861	81.8326	-0.992557	81.5761	-0.948188	77.3608	-0.974864	78.5886	-1.10832	74.5694	-1.12341	61.7078	-1.11964	69.9572	-1.12295	69.1712	-1.12951	66.2124	-1.1263	73.5055	-1.1461	79.2912	-1.11155	77.9525	-1.15475	84.2031	-1.16394	79.5194	-1.17496	76.452
-0.492373	71.0737	-1.15981	67.0263	-1.14279	71.9997	-1.17588	78.3417	-1.03929	78.6419	-0.939442	69.6945	-0.945082	74.3547	-0.94211	71.4366	-0.940017	90.1031	-0.951115	89.2293	-0.954002	81.9185	-0.964647	81.6445	-0.916331	77.5998	-0.94275	78.8097	-1.08536	74.6885	-1.10007	61.8389	-1.09638	70.1618	-1.09974	69.3491	-1.10804	66.2667	-1.1045	73.7159	-1.12525	79.453	-1.09044	78.1048	-1.13457	84.3494	-1.14419	79.6213	-1.15616	76.6007
-0.4714	71.1833	-1.14163	67.1243	-1.12282	72.0509	-1.15747	78.3639	-1.01399	78.8249	-0.910083	69.8543	-0.914132	74.5126	-0.911948	71.6342	-0.909633	90.23	-0.920492	89.4135	-0.925045	82.029	-0.932326	81.7124	-0.883261	77.7438	-0.911515	78.9714	-1.06	74.7646	-1.07806	61.9298	-1.07415	70.1995	-1.0788	69.4024	-1.08588	66.4332	-1.08344	73.7682	-1.10471	79.5841	-1.06892	78.1444	-1.11481	84.49	-1.12442	79.7797	-1.13639	76.6591
-0.449267	71.3373	-1.12239	67.2424	-1.10283	72.1619	-1.13897	78.4074	-0.989314	78.9518	-0.878938	69.9643	-0.882444	74.7239	-0.881378	71.7209	-0.878298	90.3877	-0.890398	89.6236	-0.892127	82.1013	-0.904365	81.7702	-0.851165	77.9645	-0.879803	79.3125	-1.03721	74.8239	-1.05395	61.9933	-1.0508	70.3402	-1.05607	69.6241	-1.06426	66.5316	-1.06206	73.9049	-1.08384	79.721	-1.04786	78.2732	-1.09474	84.5592	-1.10447	79.9404	-1.1172	76.7961
-0.428023	71.4303	-1.10433	67.3525	-1.08272	72.2575	-1.1207	78.4438	-0.963767	79.0999	-0.849366	70.1347	-0.851556	74.9394	-0.851292	71.8507	-0.846551	90.5669	-0.859616	89.8196	-0.863175	82.2173	-0.872106	81.7983	-0.818297	78.2233	-0.84925	79.431	-1.01287	74.9164	-1.03263	62.0753	-1.02962	70.4914	-1.03543	69.6387	-1.04169	66.6529	-1.0412	74.0331	-1.06338	79.8535	-1.02647	78.384	-1.07478	84.7167	-1.08478	79.9853	-1.09693	76.8934
-0.406041	71.5671	-1.08488	67.4151	-1.06294	72.3818	-1.10239	78.5009	-0.938744	79.2571	-0.818295	70.3188	-0.819724	75.1421	-0.820558	71.9642	-0.815265	90.7293	-0.8288	90.0389	-0.830435	82.3264	-0.844245	81.8474	-0.786299	78.3874	-0.817061	79.7507	-0.989803	75.0307	-1.0087	62.2021	-1.00612	70.6098	-1.01251	69.7726	-1.01973	66.7583	-1.0197	74.1813	-1.04278	79.9736	-1.00542	78.5064	-1.05497	84.7872	-1.06488	80.037	-1.07787	77.0783
-0.384942	71.698	-1.06687	67.5371	-1.04249	72.4849	-1.08401	78.5048	-0.913637	79.378	-0.788922	70.3785	-0.788862	75.3298	-0.790349	72.1251	-0.78382	90.9055	-0.798267	90.2054	-0.801613	82.4452	-0.811912	81.8658	-0.753177	78.5784	-0.78656	80.416	-0.964336	75.0929	-0.986869	62.2498	-0.98445	70.707	-0.9916	69.9652	-0.997639	66.8968	-0.998722	74.3197	-1.02238	80.0562	-0.984648	78.537	-1.03527	84.961	-1.04491	80.1976	-1.05794	77.1565
-0.363036	71.8219	-1.04724	67.6242	-1.02231	72.62	-1.06577	78.5722	-0.889011	79.5276	-0.758061	70.56	-0.759952	75.4694	-0.759622	72.261	-0.753227	91.0184	-0.767349	90.4206	-0.768655	82.4837	-0.783849	81.93	-0.720661	78.8401	-0.754767	80.3184	-0.941444	75.221	-0.962885	62.3466	-0.961628	70.8808	-0.969182	70.0562	-0.975879	67.0389	-0.977612	74.4013	-1.00121	80.2472	-0.963725	78.6775	-1.01552	85.0288	-1.02501	80.3049	-1.03907	77.2942
-0.342331	71.9447	-1.02938	67.7314	-1.00234	72.6999	-1.04761	78.599	-0.864293	79.6837	-0.728668	70.737	-0.728714	75.7351	-0.729692	72.4246	-0.721431	91.2221	-0.735845	90.5886	-0.739853	82.6132	-0.751554	81.9429	-0.687528	79.0302	-0.724156	80.5763	-0.916252	75.3387	-0.941149	62.4567	-0.940222	70.9645	-0.948725	70.1629	-0.95357	67.1272	-0.956361	74.5881	-0.980909	80.3763	-0.94282	78.7013	-0.994953	85.1886	-1.00527	80.4059	-1.01928	77.3676
-0.320087	72.0548	-1.00995	67.8232	-0.982508	72.7982	-1.02911	78.6615	-0.840116	79.7949	-0.697835	70.8529	-0.699588	75.9309	-0.698947	72.5539	-0.690332	91.3405	-0.705169	90.8028	-0.70692	82.7714	-0.723815	82.014	-0.655496	79.1872	-0.692519	80.7451	-0.892971	75.4342	-0.916675	62.584	-0.916564	71.116	-0.926765	70.4492	-0.931856	67.2621	-0.934775	74.7169	-0.960299	80.3892	-0.921601	78.8786	-0.974359	85.2877	-0.985318	80.5121	-1.00038	77.5477
-0.299224	72.1835	-0.991998	67.9312	-0.962761	72.8784	-1.01073	78.6734	-0.815116	79.9704	-0.66811	70.9935	-0.668107	76.0937	-0.668747	72.6622	-0.658486	91.5126	-0.674388	90.9603	-0.678081	82.8757	-0.691662	82.0298	-0.622573	79.4314	-0.661609	80.8954	-0.86834	75.5519	-0.894686	62.652	-0.895382	71.2882	-0.905888	70.3941	-0.908943	67.3712	-0.913821	74.8279	-0.939569	80.5545	-0.900317	78.9269	-0.95491	85.4134	-0.965778	80.6179	-0.981042	77.5606
-0.277382	72.3263	-0.972353	68.0277	-0.942772	72.973	-0.992357	78.7255	-0.790422	80.135	-0.637118	71.1495	-0.63918	76.2915	-0.638002	72.7935	-0.627043	91.7484	-0.643607	91.1957	-0.64489	82.9885	-0.663798	82.1306	-0.590673	79.6027	-0.629632	80.9003	-0.845136	75.652	-0.870595	62.7338	-0.87185	71.36	-0.883394	70.5309	-0.887295	67.4583	-0.892373	74.9698	-0.917639	80.7325	-0.879769	79.0417	-0.935128	85.4891	-0.94555	80.772	-0.961831	77.7385
-0.256599	72.4795	-0.954188	68.1377	-0.922722	73.1321	-0.973996	78.7926	-0.765478	80.2616	-0.607317	71.3304	-0.607867	76.5039	-0.607959	72.9373	-0.595332	91.8161	-0.612791	91.4076	-0.616021	83.1607	-0.631565	82.1295	-0.557738	79.8256	-0.598587	81.1486	-0.819675	75.744	-0.848886	62.823	-0.85012	71.5356	-0.862655	70.65	-0.864851	67.6401	-0.871313	75.092	-0.897259	80.9267	-0.858748	79.1731	-0.91449	85.7066	-0.926061	80.8479	-0.941714	77.8168
-0.234713	72.5905	-0.934822	68.2087	-0.902348	73.2078	-0.955699	78.8203	-0.740994	80.4263	-0.575437	71.4398	-0.578762	76.6784	-0.577421	73.0213	-0.564185	91.9879	-0.582257	91.6094	-0.58335	83.3147	-0.603732	82.2468	-0.525881	80.0323	-0.566505	81.9113	-0.796428	75.8229	-0.824769	62.8995	-0.826922	71.6671	-0.840342	70.7685	-0.843183	67.7068	-0.849857	75.2487	-0.876762	81.0437	-0.838023	79.2253	-0.894799	85.7362	-0.906405	80.9505	-0.92296	77.9422
-0.213341	72.75	-0.917044	68.3098	-0.882325	73.2854	-0.937373	78.8498	-0.716216	80.5582	-0.546066	71.5909	-0.547767	76.907	-0.547422	73.1929	-0.533222	92.1343	-0.551329	91.8066	-0.554603	83.4906	-0.571479	82.2721	-0.492264	80.2506	-0.535759	82.1977	-0.772143	75.9491	-0.803426	62.9589	-0.805217	71.8086	-0.819661	70.8957	-0.821041	67.8481	-0.828616	75.3255	-0.856371	81.187	-0.816923	79.363	-0.874939	85.9045	-0.886992	81.077	-0.903347	78.0274
-0.191485	72.8883	-0.897611	68.4194	-0.862207	73.3783	-0.918913	78.8946	-0.69161	80.7225	-0.515074	71.7657	-0.518662	77.1346	-0.517044	73.333	-0.502011	92.3306	-0.520713	92.0186	-0.521621	83.6405	-0.543342	82.3055	-0.459562	80.491	-0.503762	82.4402	-0.74891	76.039	-0.77923	63.11	-0.781958	71.9454	-0.79692	71.039	-0.799228	67.9269	-0.807186	75.4644	-0.835704	81.3116	-0.796362	79.55	-0.855302	85.9643	-0.866924	81.2207	-0.884432	78.2099
-0.170264	73.0267	-0.879736	68.5092	-0.842221	73.4996	-0.90078	78.9279	-0.666119	80.8629	-0.48576	71.9253	-0.487297	77.3425	-0.487327	73.4475	-0.470541	92.5146	-0.490407	92.2205	-0.492601	83.8474	-0.511092	82.3952	-0.42665	80.7203	-0.473122	82.3963	-0.723796	76.172	-0.757397	63.1819	-0.760335	72.0767	-0.776405	71.2199	-0.776841	68.0789	-0.786115	75.6238	-0.815415	81.4282	-0.775245	79.5746	-0.835635	86.2135	-0.847327	81.3042	-0.864313	78.3356
-0.148699	73.1843	-0.860399	68.6064	-0.821889	73.6119	-0.882279	78.9997	-0.641871	81.0098	-0.454031	72.0504	-0.458399	77.5872	-0.456786	73.5958	-0.438905	92.6828	-0.459373	92.4761	-0.46002	83.9491	-0.48319	82.5002	-0.394402	81.0003	-0.441429	82.7741	-0.700689	76.2502	-0.732947	63.3238	-0.737259	72.2	-0.753929	71.2554	-0.754562	68.1485	-0.764568	75.7531	-0.794024	81.57	-0.754045	79.7551	-0.815755	86.249	-0.827461	81.352	-0.845383	78.4305
-0.127277	73.3308	-0.842392	68.6975	-0.801579	73.7105	-0.863956	79.0572	-0.616726	81.1532	-0.424624	72.1832	-0.427203	77.7661	-0.426833	73.7037	-0.40768	92.8406	-0.428689	92.5724	-0.431227	84.1122	-0.450822	82.5365	-0.36156	81.3008	-0.410445	83.1638	-0.67644	76.3375	-0.711701	63.4098	-0.715754	72.3632	-0.733093	71.4065	-0.732367	68.3098	-0.743488	75.908	-0.773628	81.6881	-0.733033	79.7779	-0.795928	86.3471	-0.807695	81.5879	-0.825969	78.5183
-0.105966	73.4243	-0.823198	68.8186	-0.78183	73.8196	-0.845301	79.06	-0.592306	81.3075	-0.393507	72.3711	-0.397984	77.9934	-0.396249	73.876	-0.37643	93.0526	-0.381	92.9895	-0.398577	84.2999	-0.422863	82.7096	-0.329329	81.6121	-0.378456	82.9116	-0.653473	76.4484	-0.687796	63.4743	-0.692645	72.4995	-0.7106	71.5562	-0.710765	68.4254	-0.721653	76.0991	-0.752439	81.773	-0.711688	79.9249	-0.776281	86.4651	-0.787798	81.6264	-0.807136	78.7064
-0.0852188	73.5956	-0.805335	68.8969	-0.761736	73.8857	-0.826766	79.1282	-0.567105	81.4782	-0.364218	72.5199	-0.366564	78.2048	-0.366444	74.0218	-0.344824	93.2834	-0.34776	93.2169	-0.369836	84.4666	-0.390481	82.8569	-0.296235	81.9146	-0.347831	83.3266	-0.628668	76.5508	-0.666005	63.5869	-0.671	72.6483	-0.68954	71.6362	-0.688206	68.6178	-0.700577	76.193	-0.731747	81.939	-0.6904	80.0108	-0.756875	86.6028	-0.768026	81.7585	-0.787556	78.7826
-0.0636456	73.7112	-0.786179	69.0245	-0.741864	74.0138	-0.808575	79.1561	-0.54289	81.6651	-0.332501	72.713	-0.337596	78.4501	-0.335894	74.1437	-0.313298	93.5515	-0.317921	93.4948	-0.337041	84.6907	-0.362468	82.941	-0.263836	82.1624	-0.315858	83.6809	-0.605726	76.5976	-0.641372	63.6947	-0.647639	72.7693	-0.666694	71.7887	-0.66649	68.6642	-0.679523	76.4085	-0.710977	82.0893	-0.669464	80.1376	-0.736428	86.7081	-0.748178	81.9032	-0.768876	78.919
-0.0426954	73.8231	-0.768509	69.1042	-0.721677	74.1456	-0.789912	79.1958	-0.517724	81.8092	-0.302961	72.9118	-0.306312	78.6065	-0.305948	74.3893	-0.282395	93.8418	-0.284623	93.848	-0.30832	84.935	-0.330416	83.0476	-0.229997	82.4396	-0.285179	83.9761	-0.580924	76.7585	-0.619521	63.8025	-0.626322	72.885	-0.645805	71.8767	-0.644009	68.7871	-0.65868	76.4383	-0.690615	82.2511	-0.64831	80.2062	-0.716532	86.85	-0.728409	81.9976	-0.749417	78.9698
-0.0210691	73.9102	-0.748953	69.1856	-0.701693	74.2482	-0.771647	79.2353	-0.493415	81.9669	-0.272062	73.0738	-0.276814	78.9719	-0.275587	74.6314	-0.251357	94.1902	-0.254536	94.198	-0.27551	85.1909	-0.302324	83.2011	-0.197627	82.6866	-0.253497	84.5992	-0.557679	76.8462	-0.596163	63.8911	-0.602711	73.0655	-0.623245	72.041	-0.622252	68.8798	-0.637361	76.5586	-0.669117	82.3224	-0.6275	80.2979	-0.696802	86.9753	-0.708629	82.0518	-0.730439	79.1027
0	73.8837	-0.730811	69.3037	-0.681559	74.3517	-0.753443	79.2963	-0.468078	82.1071	-0.24264	73.4117	-0.245487	79.2505	-0.245367	74.9704	-0.219533	94.5087	-0.220842	94.5891	-0.246822	85.549	-0.269817	83.418	-0.164368	82.8918	-0.222519	84.8344	-0.532248	76.9876	-0.5745	63.9796	-0.580734	73.2283	-0.602849	72.0905	-0.578234	69.1644	-0.616139	76.762	-0.649134	82.4787	-0.606692	80.3757	-0.676119	87.1117	-0.689174	82.1869	-0.710981	79.2191
0.0226189	73.6386	-0.71093	69.4314	-0.661803	74.4578	-0.73503	79.3097	-0.443841	82.3018	-0.211296	73.6641	-0.21632	79.7139	-0.214249	75.1684	-0.188351	94.7822	-0.191008	94.9436	-0.213988	85.8396	-0.241638	83.5832	-0.132467	83.1169	-0.190423	84.9453	-0.509094	77.1252	-0.550688	64.0885	-0.557262	73.3482	-0.58062	72.2873	-0.555786	69.2898	-0.59472	76.915	-0.628434	82.6397	-0.585761	80.5003	-0.65653	87.2475	-0.669055	82.2917	-0.692169	79.3492
0.0424497	73.6512	-0.693015	69.5378	-0.641889	74.5939	-0.716813	79.3802	-0.419014	82.4559	-0.181793	73.9181	-0.185057	80.0269	-0.183984	75.3987	-0.156761	95.032	-0.157011	95.2428	-0.185142	86.1328	-0.209145	83.6807	-0.0989833	83.2809	-0.159672	85.3764	-0.483761	77.3167	-0.529081	64.1865	-0.536092	73.4265	-0.560309	72.4222	-0.533736	69.4395	-0.573548	77.0315	-0.608201	82.7927	-0.565218	80.62	-0.636773	87.3059	-0.649519	82.4403	-0.672204	79.5192
0.0646369	73.5882	-0.673787	69.6168	-0.621819	74.6645	-0.698502	79.4217	-0.394506	82.6069	-0.150849	74.1663	-0.156012	80.2232	-0.152682	75.617	-0.125271	95.2671	-0.126958	95.5241	-0.151776	86.3347	-0.181213	83.9479	-0.067018	83.4511	-0.127343	85.6063	-0.460588	77.4587	-0.504831	64.3217	-0.512819	73.5781	-0.538254	72.5731	-0.511394	69.5114	-0.552007	77.2159	-0.587244	82.8611	-0.544362	80.7269	-0.616907	87.4492	-0.629969	82.5405	-0.653106	79.6091
0.0843925	73.5297	-0.655811	69.7104	-0.601509	74.8125	-0.680208	79.4522	-0.369548	82.7828	-0.121075	74.3919	-0.124578	80.5413	-0.12259	75.7604	-0.0944882	95.5155	-0.0940327	95.8181	-0.123192	86.5677	-0.148595	84.0086	-0.0330083	83.4925	-0.0963755	86.0143	-0.435077	77.6142	-0.483258	64.4274	-0.491544	73.709	-0.517636	72.729	-0.489225	69.6952	-0.530758	77.3059	-0.567127	82.9673	-0.523805	80.836	-0.597103	87.6422	-0.610599	82.6921	-0.633591	79.698
0.105048	73.505	-0.636226	69.7993	-0.581655	74.8843	-0.662021	79.4986	-0.345117	82.9521	-0.0899724	74.6353	-0.0934424	80.8543	-0.0917679	75.9815	-0.0632383	95.6277	-0.0639323	95.9971	-0.0902478	86.7929	-0.120402	84.2244	0	83.4808	-0.064303	86.0595	-0.41199	77.6947	-0.459012	64.5029	-0.468414	73.865	-0.495212	72.8183	-0.466927	69.8409	-0.509356	77.4662	-0.545479	83.1796	-0.50182	80.9148	-0.577261	87.6904	-0.59099	82.7512	-0.614697	79.8461
0.12499	73.5766	-0.618515	69.907	-0.561701	75.0167	-0.643635	79.5552	-0.320202	83.1301	-0.0605493	74.7522	-0.062078	81.0658	-0.0614048	76.138	-0.0315137	95.6302	-0.0298395	95.9031	-0.0615425	86.9971	-0.0879182	84.4047	0.0345836	83.2001	-0.0334359	86.1349	-0.386789	77.8561	-0.437609	64.579	-0.447017	74.003	-0.474751	72.924	-0.444905	69.932	-0.488294	77.5784	-0.523185	83.3344	-0.48024	81.0227	-0.557679	87.8283	-0.571247	82.9426	-0.594924	79.9115
0.146945	73.634	-0.599192	70.0194	-0.541327	75.0811	-0.625566	79.5624	-0.296194	83.3108	-0.0293036	74.871	-0.0309547	81.3219	-0.0300862	76.2643	0	95.5008	0	95.7428	-0.028674	87.1161	-0.060193	84.5613	0.066156	83.0652	0	85.7902	-0.363847	77.9839	-0.413657	64.7108	-0.424131	74.1822	-0.452564	73.1055	-0.422455	70.0447	-0.466707	77.6845	-0.502075	83.4727	-0.459332	81.2003	-0.538003	87.9672	-0.551603	83.0115	-0.575982	80.0609
0.167881	73.6559	-0.581365	70.1229	-0.52121	75.2046	-0.607176	79.5838	-0.271535	83.4844	0	74.7814	0	81.4551	0	76.3048	0.0314996	95.3446	0.0324528	95.6208	0	87.241	-0.0277588	84.5693	0.0991668	82.9534	0.0300978	85.8628	-0.338744	78.1393	-0.391814	64.8142	-0.402573	74.3191	-0.431778	73.1983	-0.400343	70.1896	-0.445325	77.8905	-0.479396	83.632	-0.438658	81.2881	-0.518079	88.1346	-0.532035	83.1355	-0.556483	80.1392
0.190016	73.5829	-0.561548	70.2076	-0.501541	75.3253	-0.588751	79.6497	-0.246548	83.682	0.0310765	74.4477	0.0311355	81.4596	0.0317886	76.2774	0.0617885	95.1928	0.0622269	95.6072	0.0329352	86.8555	0	84.5782	0.130756	83.0423	0.0611336	85.6249	-0.315399	78.2749	-0.367614	64.9311	-0.378805	74.5546	-0.410234	73.3451	-0.378055	70.4309	-0.424324	77.9739	-0.458587	83.817	-0.416807	81.3819	-0.497119	88.2311	-0.512349	83.2622	-0.537745	80.3847
0.210981	73.8088	-0.543708	70.3198	-0.481235	75.4558	-0.570259	79.7194	-0.22163	83.9461	0.0598908	74.5181	0.0631821	81.3182	0.0628839	76.0347	0.0936892	95.0413	0.0960204	95.5926	0.061647	87.0676	0.0323852	84.2769	0.164213	83.068	0.0918258	85.7444	-0.289831	78.4073	-0.34576	65.055	-0.357483	74.6841	-0.389879	73.4423	-0.356377	70.4352	-0.403692	78.1006	-0.436664	83.94	-0.39544	81.4912	-0.477668	88.3521	-0.492929	83.4702	-0.517639	80.4429
0.23159	73.6295	-0.523943	70.431	-0.461167	75.555	-0.551969	79.7327	-0.19696	84.2488	0.0913727	74.3874	0.0940123	81.3146	0.093332	75.9519	0.125382	95.0324	0.126102	95.4731	0.095136	86.754	0.0599584	84.4693	0.195966	83.0986	0.123888	85.7778	-0.266735	78.5275	-0.321639	65.206	-0.334825	74.8602	-0.367336	73.7529	-0.334107	70.5921	-0.382183	78.2204	-0.416208	84.0262	-0.374913	81.6402	-0.457705	88.4757	-0.473136	83.5395	-0.498561	80.5307
0.251919	73.6989	-0.506001	70.5304	-0.440934	75.6616	-0.53383	79.7908	-0.172092	84.4349	0.120804	74.5531	0.125497	81.4057	0.123527	75.8796	0.157325	95.1353	0.160038	95.1421	0.124035	86.8543	0.0923104	84.3135	0.228605	83.2363	0.155192	85.6978	-0.241662	78.6202	-0.300166	65.3723	-0.313326	75.0716	-0.34678	73.7281	-0.312351	70.6738	-0.360886	78.4734	-0.393902	84.2292	-0.354035	81.7746	-0.437729	88.6289	-0.453713	83.6192	-0.479161	80.6227
0.272826	73.7927	-0.486701	70.6224	-0.420979	75.7816	-0.515934	79.8502	-0.148039	84.6588	0.151613	74.6248	0.157079	81.4583	0.154121	75.8894	0.188213	94.9419	0.190572	95.4678	0.157125	86.8007	0.120964	84.4899	0.259876	83.161	0.187463	85.8598	-0.218414	78.6857	-0.276483	65.5456	-0.290155	75.2325	-0.32452	73.8218	-0.290403	70.8734	-0.339293	78.6042	-0.372865	84.4812	-0.33341	81.9018	-0.417817	88.7148	-0.434133	83.7602	-0.460214	80.783
0.294502	73.7612	-0.468479	70.7018	-0.400755	75.8707	-0.49744	79.8325	-0.123256	84.8143	0.181574	74.6713	0.188442	81.6856	0.183869	75.925	0.219742	95.085	0.224648	95.3754	0.185947	86.8447	0.153299	84.4767	0.291912	83.3726	0.218225	86.2952	-0.193268	78.7816	-0.25439	65.7481	-0.268843	75.4696	-0.303615	73.9989	-0.268186	71.0402	-0.318038	78.8446	-0.350832	84.6176	-0.312665	81.973	-0.398468	88.8686	-0.414611	83.8781	-0.440541	80.8511
0.315131	73.8937	-0.448703	70.8226	-0.380961	75.9716	-0.479222	79.9023	-0.0987597	85.0676	0.212429	74.7987	0.219702	81.5493	0.214666	75.9074	0.2511	94.9767	0.254663	95.6299	0.219693	86.8085	0.181067	84.1909	0.323227	83.3334	0.250097	86.0256	-0.170472	78.8245	-0.230094	65.9051	-0.246292	75.6758	-0.280871	74.182	-0.245812	71.1465	-0.296713	78.9936	-0.329355	84.8058	-0.292028	82.1527	-0.37876	89.0219	-0.394997	84.029	-0.421797	81.0787
0.335964	73.8323	-0.430826	70.9031	-0.36124	76.0665	-0.460811	79.9422	-0.0736384	85.2412	0.241936	74.7998	0.25101	81.5411	0.244733	75.7504	0.282886	95.1124	0.288985	95.6006	0.248719	86.4382	0.212761	84.2488	0.356532	83.5793	0.281074	86.4114	-0.145142	78.9209	-0.207809	66.0371	-0.224796	75.9559	-0.260009	74.3556	-0.223173	71.3573	-0.275569	79.0787	-0.306725	85.0038	-0.270797	82.2097	-0.359113	89.1666	-0.375184	84.2271	-0.402406	81.1373
0.357089	73.8793	-0.410969	71.0374	-0.341189	76.217	-0.442724	80.0067	-0.0491632	85.4665	0.273178	74.9226	0.282122	81.8387	0.275164	75.68	0.314399	95.1788	0.319041	95.7093	0.282504	86.6428	0.240918	84.034	0.388067	83.5004	0.31221	86.4584	-0.122337	79.0004	-0.183603	66.1389	-0.201625	76.18	-0.237079	74.5776	-0.200737	71.4752	-0.253993	79.2713	-0.285664	85.0819	-0.249541	82.3793	-0.339437	89.2757	-0.355237	84.3272	-0.3836	81.295
0.377995	74.015	-0.393136	71.1113	-0.321594	76.3389	-0.424719	80.0994	-0.0242714	85.63	0.302273	75.0215	0.312815	81.7022	0.304731	75.6939	0.346322	94.8266	0.352246	95.591	0.311279	86.8487	0.273416	84.1296	0.420281	83.6929	0.343009	86.5657	-0.0968307	79.0488	-0.161926	66.2906	-0.17977	76.2932	-0.216024	74.814	-0.178896	71.5802	-0.232943	79.376	-0.262828	85.2887	-0.22883	82.5608	-0.319292	89.4546	-0.335235	84.461	-0.363968	81.4212
0.39963	73.9685	-0.373679	71.2573	-0.3018	76.4499	-0.406405	80.1461	0	85.7554	0.333095	75.1483	0.344079	81.755	0.336152	75.9893	0.377027	94.7069	0.381955	95.6987	0.344428	86.9943	0.30147	84.0279	0.452418	83.6882	0.374355	86.8134	-0.0736024	79.1088	-0.138779	66.4209	-0.155897	76.4051	-0.193604	74.9773	-0.156358	71.7115	-0.211319	79.4986	-0.241564	85.469	-0.20805	82.7205	-0.29959	89.5357	-0.315445	84.5959	-0.345119	81.5992
0.420682	74.1057	-0.356073	71.353	-0.282347	76.5908	-0.388003	80.2239	0.0250637	85.7234	0.362584	75.0386	0.375086	81.88	0.366535	75.424	0.40782	94.9043	0.415419	95.7959	0.373414	86.8331	0.334196	84.0191	0.484846	83.9132	0.405097	86.8347	-0.0488354	79.1161	-0.117132	66.5447	-0.133963	76.6272	-0.172844	75.2043	-0.13419	71.8345	-0.190127	79.6029	-0.219168	85.6324	-0.18725	82.8503	-0.279982	89.7303	-0.295915	84.8123	-0.325564	81.6997
0.443007	74.1149	-0.336355	71.4583	-0.262524	76.7525	-0.369887	80.3145	0.0505171	85.4337	0.39443	75.1935	0.406053	81.9834	0.397647	75.6323	0.438648	94.8685	0.445472	96.2435	0.40681	86.831	0.362052	84.2019	0.516687	83.9604	0.43712	86.9298	-0.025664	79.1812	-0.0925185	66.6702	-0.111156	76.8414	-0.149698	75.3679	-0.111455	72.0059	-0.168804	79.776	-0.197945	85.8295	-0.16587	82.9852	-0.259781	89.8969	-0.276037	84.9103	-0.306774	81.9047
0.464537	74.1869	-0.319358	71.5936	-0.242736	76.8486	-0.351643	80.3877	0.0753358	84.988	0.423692	75.329	0.43741	82.2568	0.427574	75.7083	0.469886	95.4599	0.479113	96.1866	0.435853	87.038	0.394533	84.3828	0.548468	83.8976	0.468436	87.2533	0	79.2303	-0.0706963	66.7462	-0.0897585	77.0162	-0.129345	75.5935	-0.0893959	72.069	-0.147829	79.8692	-0.175009	85.9213	-0.145433	83.0832	-0.239889	90.0961	-0.256439	85.1189	-0.286554	82.0491
0.486194	74.1596	-0.300018	71.7027	-0.222692	76.9684	-0.333148	80.5199	0.0998339	84.9845	0.454554	75.2919	0.468265	82.0698	0.458397	76.3125	0.50088	95.1298	0.50943	96.4186	0.468211	86.9738	0.422353	84.4085	0.580206	84.1556	0.500212	87.3361	0.023393	79.199	-0.0461681	66.8778	-0.0667206	77.1615	-0.106745	75.7971	-0.0668534	72.193	-0.126489	80.0152	-0.154019	86.1	-0.1247	83.2095	-0.219661	90.2671	-0.236537	85.3161	-0.267688	82.2433
0.506308	74.4751	-0.28212	71.877	-0.202934	77.0832	-0.315014	80.6425	0.124866	84.936	0.48381	75.295	0.499318	82.17	0.488612	76.387	0.532451	95.7096	0.543327	96.5253	0.497324	87.1692	0.45477	84.3761	0.612751	84.28	0.530735	87.3563	0.0483312	79.0814	-0.024145	66.88	-0.0450379	77.3025	-0.0859469	75.9826	-0.0451069	72.2878	-0.105586	80.0749	-0.131071	86.193	-0.104075	83.3443	-0.199763	90.3942	-0.216634	85.4502	-0.248266	82.3623
0.527961	74.7063	-0.26269	71.9759	-0.18236	77.1482	-0.296356	80.7868	0.148813	85.0581	0.514809	75.554	0.530238	82.4514	0.519496	76.219	0.563835	95.7029	0.573014	96.1365	0.529951	87.3499	0.482858	84.5073	0.644993	84.3276	0.562071	87.6603	0.072706	78.8457	0	66.7828	-0.0215372	77.369	-0.0634043	76.2095	-0.0224245	72.3555	-0.0844264	80.1357	-0.11004	86.3476	-0.0828445	83.4631	-0.179855	90.5206	-0.196775	85.5742	-0.229491	82.4891
0.549082	74.6123	-0.244874	72.079	-0.16191	77.302	-0.277699	80.8529	0.172831	85.0865	0.544	75.5842	0.561071	82.3588	0.54962	76.314	0.594628	95.4185	0.606806	96.452	0.559	87.6146	0.51517	84.5701	0.677311	84.4538	0.592822	87.9666	0.0971915	78.5227	0.0224843	66.5544	0	77.3017	-0.042688	76.3285	0	72.46	-0.0629907	80.3128	-0.0874569	86.5187	-0.0623426	83.5957	-0.159683	90.7084	-0.177093	85.721	-0.210123	82.5954
0.570108	74.4727	-0.225232	72.2414	-0.141438	77.4145	-0.259332	80.9614	0.197123	85.201	0.575129	75.781	0.592492	82.4882	0.580477	76.4265	0.625721	95.6169	0.63679	96.6907	0.592006	87.5445	0.543094	84.9032	0.70928	84.6231	0.62454	87.5325	0.119746	78.3381	0.0467618	66.6453	0.0239198	77.0618	-0.0204739	76.2036	0.0225355	72.4358	-0.0417699	80.3537	-0.0666235	86.6058	-0.0417941	83.6849	-0.139702	90.8256	-0.157645	85.8358	-0.190814	82.7277
0.591312	74.7223	-0.207191	72.3718	-0.121163	77.5533	-0.24064	81.0291	0.221799	85.1046	0.604185	75.8696	0.623222	82.5414	0.610572	76.3114	0.657803	95.6334	0.669994	96.3945	0.620899	87.6121	0.575374	84.5322	0.741523	84.7864	0.655022	88.3702	0.14463	78.3112	0.0687093	66.4569	0.0451161	76.8588	0	76.2766	0.0446403	72.1344	-0.0209027	80.4676	-0.0439788	86.6967	-0.0210288	83.7021	-0.119935	90.9617	-0.138126	85.9803	-0.171441	82.8869
0.613593	74.8091	-0.187499	72.4742	-0.101157	77.6923	-0.221958	81.1031	0.245369	85.3538	0.635204	75.8222	0.654759	82.8792	0.641289	76.406	0.68879	96.1009	0.69971	97.3184	0.65423	87.6595	0.603604	84.8495	0.83665	40.1048	0.716902	44.2383	0.167571	78.3172	0.0933021	66.4885	0.0686539	76.9455	0.021876	76.0141	0.0671926	71.9759	0	80.5377	-0.0225628	86.8309	0	83.5929	-0.10045	91.0993	-0.118492	86.1418	-0.152659	83.0645
0.634028	75.109	-0.169572	72.5283	-0.0810692	77.8136	-0.203265	81.2005	0.269203	85.6289	0.664361	75.8698	0.685807	82.9937	0.671686	76.489	0.75125	47.8665	0.733206	97.1858	0.682925	88.0068	0.635907	84.858	0.869403	40.1777	0.748177	44.3901	0.19138	78.3616	0.114653	66.4679	0.0898586	76.9184	0.0424313	76.0442	0.0894154	71.9993	0.021338	80.4128	0	87.0122	0.0204209	83.4899	-0.0808427	91.2176	-0.0988405	86.285	-0.133417	83.1919
0.655436	74.9471	-0.14956	72.6518	-0.0612314	77.9547	-0.184573	81.2685	0.292818	84.9971	0.69501	75.6319	0.71705	83.0788	0.702242	76.5668	0.77841	48.6625	0.762712	96.99	0.716135	87.9819	0.663979	85.2372	0.901795	40.1459	0.778584	44.309	0.214219	78.519	0.138361	66.6186	0.113138	76.8743	0.064278	76.0701	0.111159	72.0019	0.0424649	80.2721	0.0212414	86.9391	0.0415127	83.7096	-0.0604465	91.3693	-0.0790623	86.3854	-0.114894	83.303
0.675759	75.0766	-0.131488	72.7988	-0.0408985	77.9792	-0.166252	81.3603	0.317735	85.2133	0.724375	75.9196	0.748394	83.1793	0.732502	76.8077	0.809722	48.7352	0.796551	97.6898	0.74511	88.1439	0.696347	84.9391	0.935592	40.258	0.810777	44.4619	0.239255	78.2202	0.159292	66.8528	0.135121	76.9416	0.085064	75.9977	0.132549	72.1667	0.0634171	80.0132	0.0437724	86.6256	0.0623668	83.7049	-0.039766	91.4472	-0.0594099	86.5393	-0.0956441	83.4203
0.69779	75.0883	-0.112259	72.9532	-0.0204985	78.1043	-0.147827	81.4873	0.342537	85.3487	0.755125	76.2216	0.779436	83.2786	0.763043	76.719	0.841189	48.7874	0.826487	97.6732	0.777774	88.2585	0.724534	85.3213	0.968014	40.3158	0.841376	44.6992	0.261902	78.3017	0.182886	66.916	0.15805	77.1715	0.108172	76.278	0.153941	72.1711	0.084645	79.9976	0.0652	86.4653	0.0827939	83.4299	-0.020353	91.4699	-0.0391214	86.6385	-0.077069	83.5794
0.718324	75.2313	-0.0940725	73.0447	0	78.1661	-0.129421	81.5305	0.36656	85.1694	0.815239	76.1748	0.81079	83.3649	0.792465	36.2656	0.872288	48.8158	0.860041	97.7807	0.807018	88.5821	0.755978	85.3672	1.00092	40.3812	0.873309	44.7894	0.286474	78.276	0.205035	66.5554	0.179217	77.4013	0.128673	76.0477	0.17542	72.1301	0.105356	80.0185	0.0874874	86.501	0.10339	83.7394	0	91.6077	-0.0196031	86.6876	-0.0574943	83.6655
0.740582	75.2847	-0.0748762	73.1958	0.0199009	78.1689	-0.111086	81.6113	0.391451	85.1424	0.875216	38.5078	0.841672	83.5435	0.822895	36.3124	0.903786	48.8397	0.923083	47.6817	0.840047	88.6368	0.784107	85.3322	1.0336	40.4543	0.903859	44.8093	0.309258	78.2917	0.228361	66.6678	0.201556	77.2172	0.151309	76.3815	0.197905	72.1219	0.126053	79.8378	0.108928	86.3813	0.125108	83.6675	0.0194346	91.3403	0	86.7337	-0.0388189	83.6817
0.761512	75.3118	-0.0568967	73.2968	0.0404172	78.0091	-0.0925115	81.652	0.416147	85.3197	0.905035	38.5595	0.872621	83.5633	0.853016	36.3953	0.93521	48.889	0.923167	50.7788	0.869033	88.7212	0.816629	85.6781	1.06671	40.5653	0.936249	44.8097	0.334573	78.4747	0.249595	66.6704	0.222936	77.3063	0.172165	76.4336	0.219951	72.2114	0.146612	79.8266	0.130934	86.5156	0.146185	83.6484	0.0398317	91.3445	0.0197684	86.6287	-0.0193587	83.7423
0.782861	74.4672	-0.0375599	73.4146	0.06128	77.7557	-0.0739702	81.7358	0.440507	85.4375	0.936841	38.5878	0.904088	83.9218	0.8837	36.3677	0.966594	48.9344	0.951097	50.8923	0.901637	88.858	0.844526	85.6838	1.09875	40.6311	0.967012	45.0096	0.357589	78.2607	0.273591	66.6664	0.245587	77.586	0.19361	76.526	0.24248	72.2296	0.168546	79.2799	0.152516	86.7101	0.16748	83.8891	0.0604212	91.574	0.040028	86.6462	0	83.7683
0.803908	75.5855	-0.0195111	73.4576	0.0810914	77.6125	-0.0555048	81.7507	0.464618	85.6007	0.966481	38.6232	0.93481	84.098	0.913755	36.4463	0.997865	49.0174	0.984917	50.9723	0.930606	88.9822	0.876878	85.9032	1.13222	40.6962	0.998619	45.1555	0.383088	78.1699	0.295432	66.8627	0.266836	77.347	0.213838	76.5033	0.264706	72.3284	0.189562	80.2826	0.174784	86.9876	0.188479	83.8405	0.0796862	91.5347	0.0595565	86.6123	0.0197547	83.9179
0.825123	75.4817	0	73.4457	0.100119	77.649	-0.0369864	81.8275	0.489195	85.9197	0.997793	38.6736	0.96587	84.2675	0.944387	36.4197	1.02933	49.0461	1.01482	51.0751	0.963182	89.2505	0.904768	86.1478	1.16409	40.7946	1.02961	45.2996	0.405449	78.3956	0.319422	66.6941	0.289894	77.4573	0.236307	76.5261	0.287358	72.5014	0.210544	79.6654	0.195724	86.8896	0.209576	83.9372	0.100941	91.5288	0.0788038	86.6473	0.0385401	83.6846
0.866561	38.4888	0.0181133	73.3985	0.119039	77.6721	-0.0184856	81.8392	0.513982	85.9027	1.0278	38.7502	0.996749	84.1832	0.974255	36.493	1.06039	49.1897	1.04855	51.1674	0.992088	89.3285	0.937296	86.0805	1.19746	40.8407	1.06172	45.3267	0.429845	78.3899	0.341092	66.8063	0.311472	77.5229	0.256114	76.6259	0.309278	72.4294	0.231303	80.3065	0.217364	86.7752	0.230644	83.6984	0.120094	91.4262	0.0983926	86.8848	0.0581282	83.6293
0.888967	38.53	0.0376741	73.2383	0.140088	77.6124	0	81.8128	0.537983	85.9806	1.05933	38.7515	1.0277	84.4438	1.00485	36.5566	1.09209	49.2398	1.07889	51.2648	1.02417	89.4587	0.965354	86.3052	1.22991	40.9832	1.09224	45.5508	0.452777	78.3444	0.364438	66.7383	0.333997	77.649	0.278453	76.7802	0.330478	72.5615	0.25218	80.5376	0.238249	86.8467	0.251775	83.7084	0.139986	91.596	0.118112	86.8432	0.0768486	83.8559
0.909989	38.5425	0.0555775	73.0598	0.159696	77.8154	0.0181305	81.7427	0.562959	86.0868	1.08905	38.8268	1.05892	84.5808	1.03506	36.6064	1.12348	49.3531	1.11297	51.308	1.05327	89.5756	0.997458	86.2633	1.2628	41.0357	1.12393	45.6475	0.477721	78.5082	0.386106	66.8377	0.35612	77.7268	0.298956	76.7979	0.352443	72.3596	0.272836	80.1075	0.260183	86.1266	0.272268	84.3077	0.159895	91.6209	0.137936	86.7594	0.0961322	83.7876
0.930459	38.5794	0.0746957	72.9737	0.17992	77.8029	0.0366081	81.719	0.587801	86.1345	1.12031	38.8841	1.09005	84.7528	1.06557	36.6755	1.15537	49.3707	1.14295	51.4397	1.1148	43.0966	1.02544	86.251	1.2946	41.1689	1.15448	45.8535	0.500688	78.424	0.4105	66.7564	0.379579	77.7881	0.321353	77.049	0.374952	72.7754	0.294286	80.7112	0.280981	86.6965	0.292671	84.2136	0.179353	91.589	0.1577	86.8016	0.115309	84.037
0.95267	38.6184	0.091888	72.9822	0.199747	77.7466	0.0554633	81.1962	0.612518	86.2363	1.14981	38.9386	1.12082	85.1084	1.09598	36.7509	1.18615	49.4344	1.17618	51.5434	1.11494	46.2991	1.05783	86.4451	1.32794	41.2417	1.1862	45.795	0.526151	78.483	0.432232	66.8642	0.400543	77.8996	0.341292	76.9159	0.396676	72.8135	0.315191	80.433	0.30247	86.0035	0.314177	84.1767	0.198619	91.56	0.177251	86.7736	0.134975	83.9679
0.973402	38.6573	0.111391	72.8817	0.219404	77.8908	0.0731242	81.078	0.636999	86.3722	1.18092	38.9731	1.15208	85.1516	1.12679	36.7539	1.21778	49.4908	1.20624	51.5807	1.14387	47.0816	1.08596	86.6337	1.36019	41.3094	1.21672	45.9322	0.548432	78.4328	0.456272	66.9251	0.424046	78.0131	0.363442	76.8758	0.419464	73.2021	0.335835	80.3198	0.324153	86.2923	0.334257	84.3306	0.218252	91.8917	0.197012	86.989	0.154123	83.9318
0.996115	38.6971	0.1293	73.0051	0.239247	77.8022	0.0912754	81.0225	0.661838	86.4602	1.21168	39.0637	1.18324	85.2185	1.15701	36.8271	1.24912	49.6002	1.23989	51.7351	1.17279	47.1862	1.11791	86.6388	1.39335	41.4292	1.24892	46.1999	0.572361	78.4146	0.477876	66.8902	0.444992	77.9691	0.384085	76.9917	0.441279	72.7666	0.357421	80.5771	0.345475	87.2695	0.355439	84.3572	0.237832	91.3465	0.21678	86.9512	0.173423	83.8632
1.0171	38.7209	0.148395	72.9071	0.25979	77.9002	0.109895	81.0166	0.686223	86.6154	1.24254	39.0925	1.21417	85.6162	1.18754	36.7902	1.28059	49.654	1.26991	51.783	1.20556	47.2854	1.14579	86.9706	1.425	41.5095	1.27918	46.3647	0.595468	78.5955	0.501013	66.9126	0.468088	78.0192	0.406983	77.1986	0.464065	72.9571	0.378515	80.7571	0.365682	87.3217	0.376554	84.6357	0.257298	92.2133	0.236369	86.662	0.192377	83.8983
1.03952	38.749	0.166091	73.0384	0.279584	77.9925	0.12793	80.8036	0.711185	86.6253	1.27354	39.1522	1.24557	85.8439	1.21739	36.8246	1.31169	49.7242	1.30338	51.8868	1.2347	47.4003	1.17778	86.9688	1.45814	41.6124	1.31115	46.3631	0.62027	78.5137	0.522076	67.0824	0.489711	77.9735	0.427406	77.1794	0.486585	73.297	0.398224	80.4474	0.388265	86.6345	0.397668	84.5283	0.277143	91.3129	0.256121	87.04	0.212049	83.5683
1.06062	38.7937	0.185089	73.039	0.300607	77.9824	0.146239	80.8605	0.735362	86.388	1.30479	39.2186	1.27624	86.0773	1.24832	36.8221	1.34335	49.824	1.33329	51.9839	1.26783	47.4632	1.20592	86.9815	1.49015	41.7085	1.34168	46.6285	0.643007	78.4982	0.545526	67.1506	0.512751	78.2097	0.449993	77.3788	0.509133	73.3157	0.41888	80.3029	0.40925	87.2108	0.418542	84.4102	0.296805	92.1667	0.275853	87.0488	0.230684	84.1301
1.08217	38.8097	0.202906	73.1683	0.321361	77.9654	0.165193	80.8383	0.759686	86.926	1.33499	39.2541	1.30753	86.4054	1.27867	36.9543	1.37468	49.9325	1.36669	52.0652	1.29724	47.5867	1.23839	87.0816	1.52343	41.8286	1.37336	46.59	0.667978	78.6034	0.566943	67.263	0.534809	78.1744	0.47061	77.5272	0.531218	73.3507	0.439724	81.124	0.431514	87.0426	0.440057	84.1539	0.316987	91.5479	0.295339	87.1891	0.25036	83.9094
1.10324	38.8688	0.221826	73.0648	0.341341	77.951	0.183065	80.9318	0.784193	86.941	1.36664	39.2917	1.33871	86.4134	1.30926	37.0067	1.40641	50.0223	1.39696	52.1857	1.33002	47.698	1.26633	87.2081	1.55517	41.8798	1.40396	46.7044	0.691446	78.5863	0.590479	67.1796	0.558577	78.3266	0.49262	77.5347	0.553689	73.5433	0.460669	81.0538	0.45224	87.546	0.461747	84.4991	0.337672	92.331	0.31531	87.3853	0.269148	84.1251
1.12492	38.9084	0.240035	73.4818	0.36124	78.1243	0.201168	80.9132	0.809635	87.2062	1.39673	39.3522	1.36979	86.507	1.33925	37.1	1.4376	50.0994	1.43019	52.2867	1.35864	47.756	1.29878	87.2878	1.58793	41.9862	1.43577	46.8519	0.715806	78.7832	0.611564	34.5984	0.580027	78.5787	0.512888	77.3555	0.575597	73.4077	0.481364	80.9281	0.474382	87.6154	0.48281	84.8763	0.358037	92.3338	0.334363	87.2486	0.288694	83.8381
1.14566	38.9733	0.259963	73.1966	0.381005	77.9895	0.219051	80.939	0.833242	87.1678	1.42791	39.422	1.40089	86.8418	1.37001	37.0903	1.46922	50.2059	1.45999	52.4077	1.39188	47.8891	1.32701	87.3054	1.62036	42.0695	1.46615	46.9747	0.76276	80.9259	0.635612	34.6436	0.603711	78.576	0.535512	77.6724	0.597616	73.6595	0.502852	80.9093	0.495011	87.689	0.50393	84.7996	0.377253	91.8818	0.355346	87.1607	0.307798	84.0908
1.16748	38.9959	0.277596	73.4003	0.400344	78.1502	0.237336	80.7578	0.858131	87.3617	1.45794	39.5086	1.43163	86.8136	1.40015	37.1339	1.50065	50.2696	1.49369	52.4678	1.42075	47.9898	1.35926	87.3216	1.65303	42.1415	1.49768	47.0959	0.7856	36.537	0.657464	34.6539	0.625033	78.5894	0.556007	77.7102	0.619408	73.5166	0.523413	80.2451	0.517065	87.8371	0.524867	84.8833	0.396859	92.0786	0.375607	87.6503	0.327097	83.8332
1.18832	39.0284	0.296874	73.3087	0.420544	78.284	0.255295	80.696	0.881883	87.5116	1.4893	39.5792	1.46276	87.2385	1.43087	37.2096	1.53233	50.3678	1.52364	52.623	1.45435	48.0759	1.38728	87.6375	1.68482	42.2912	1.5283	47.2088	0.809887	36.5457	0.681693	34.6977	0.647901	78.8686	0.577836	77.9341	0.641549	73.7219	0.54458	81.0619	0.537778	87.7758	0.546034	84.8826	0.417223	92.2678	0.396796	86.8304	0.345797	83.535
1.21036	39.0711	0.314679	73.3531	0.440032	78.2122	0.274552	80.7038	0.907027	87.62	1.51961	39.6352	1.49299	87.2633	1.46092	37.2646	1.56363	50.4557	1.55736	52.6668	1.48322	48.1712	1.41929	87.4387	1.71769	42.3965	1.55991	47.3716	0.832901	36.5663	0.703391	34.7275	0.669406	78.859	0.598675	77.2586	0.663294	73.9535	0.565096	81.6818	0.559873	88.0265	0.566758	84.9836	0.436253	92.5736	0.416581	87.6816	0.365343	84.3882
1.23268	39.1255	0.332754	73.4049	0.460205	78.2055	0.292633	80.7404	0.931339	87.7511	1.55142	39.6817	1.52354	87.4154	1.49141	37.2698	1.59503	50.5492	1.58756	52.7587	1.51595	48.3212	1.44726	87.7176	1.74974	42.5178	1.5904	47.4227	0.857051	36.5781	0.726704	34.7719	0.692464	41.3763	0.620923	39.5165	0.685355	73.8603	0.585996	81.4845	0.580894	87.8029	0.587451	84.8889	0.456583	92.7281	0.436755	87.3131	0.384808	84.1996
1.25465	39.1604	0.350358	73.445	0.479759	78.3738	0.310583	80.6804	0.956446	88.0247	1.58163	39.8025	1.55425	44.823	1.52143	37.3714	1.62623	50.6207	1.62125	52.8022	1.54524	48.4027	1.4787	87.7229			1.6221	47.517	0.879852	36.5937	0.748445	34.8008	0.713531	41.4268	0.641648	39.5348	0.707389	36.7501	0.606933	82.2388	0.603307	88.0154	0.608408	85.1063	0.476173	92.7028	0.456296	87.5675	0.403909	84.4317
1.27557	39.2168	0.370379	73.5361	0.499518	78.3281	0.328621	80.6129	0.980714	88.0333	1.61299	39.885	1.58498	44.9764	1.55211	37.4044	1.65779	50.6906	1.65103	52.8526	1.57813	48.4875	1.50667	88.0359			1.65266	47.8489	0.904887	36.6226	0.771565	34.8129	0.736557	41.4625	0.663856	39.6119	0.730512	36.8638	0.627897	81.8043	0.624122	88.1844	0.629457	85.4552	0.496752	92.3119	0.476554	87.3652	0.422277	84.4011
1.2973	39.249	0.388076	73.5846	0.518755	78.5068	0.346256	80.6084	1.00531	88.1064	1.64315	39.9241	1.61609	45.0224	1.58206	37.4722	1.6893	50.85	1.68466	52.8946	1.60703	48.5651	1.53892	88.0381					0.927558	36.6438	0.792743	34.8647	0.757482	41.4931	0.68473	39.6625	0.752334	36.86	0.648013	81.5072	0.64626	86.6666	0.650526	85.1917	0.51722	92.8491	0.496585	87.715	0.442038	84.7221
1.31839	39.3045	0.407669	73.5923	0.538971	78.5665	0.364016	80.7645	1.0294	88.1405	1.67477	40.012	1.64667	45.1582	1.61292	37.5849			1.71446	52.9831	1.6404	48.6354	1.56666	88.1128					0.95177	36.6623	0.816719	34.879	0.78105	41.5608	0.706977	39.6527	0.774972	36.9285	0.669358	82.0555	0.666938	45.3085	0.671641	85.1709	0.537561	92.8757	0.516319	87.6256	0.460944	84.6686
1.33958	39.3461	0.425208	73.707	0.558342	78.649	0.382609	80.7841	1.05469	88.192	1.70532	40.082	1.67749	45.2053	1.64332	37.6002			1.74838	53.0367	1.6691	48.7045	1.59933	88.3708					0.974242	36.6944	0.838126	34.9078	0.803027	41.6272	0.728246	39.7597	0.796951	36.908	0.690499	81.7688	0.667023	43.3913	0.713247	42.5473	0.5578	93.0032	0.536026	87.8682	0.481197	84.8223
1.36126	39.4003	0.445416	73.7574	0.578926	77.7022	0.400404	80.7955	1.07906	88.4499	1.737	40.1104	1.7084	45.3237	1.67428	37.6517			1.77809	53.1392	1.70147	48.7634	1.62745	88.451					0.998724	36.7381	0.86151	34.9258	0.826728	41.7022	0.751059	39.8392	0.817564	37.0437	0.712219	82.5467	0.687288	43.4619	0.734638	42.5047	0.577321	92.9489	0.555976	87.9509	0.500556	84.9185
1.38304	39.4251	0.463144	73.9245	0.598373	78.5349	0.418922	80.6198	1.1032	88.5052	1.76733	40.1994	1.73944	45.385	1.70454	37.7649			1.81168	53.224	1.7303	48.8601	1.66044	88.5252					1.02209	36.7599	0.882792	34.9827	0.848537	41.7374	0.771589	39.7505	0.83968	37.1195	0.733472	82.4463	0.709597	43.4889	0.756287	42.5718	0.597059	92.8255	0.57586	88.3434	0.520103	84.9438
1.40426	39.4596	0.482064	73.7476	0.618286	78.9725	0.437569	80.8336	1.12792	88.8376	1.79837	40.2695	1.7703	45.5288	1.73528	37.8013			1.84143	53.3601	1.76332	48.9729	1.68861	88.6762					1.04807	36.7731	0.90742	34.9879	0.871597	41.7674	0.794787	39.8772	0.862544	37.1304	0.755833	82.565	0.732961	43.5418	0.778128	42.6008	0.616813	93.465	0.59592	88.1784	0.539313	84.4442
1.4252	39.5289	0.499062	74.0069	0.638068	78.1729	0.456034	80.8857	1.15223	88.7609	1.82855	40.3459	1.80124	45.5682	1.76536	37.8253			1.87508	53.416	1.79193	48.9393	1.7203	88.7627					1.07082	36.8107	0.930143	34.843	0.893091	41.8214	0.815492	39.9183	0.884972	37.1926	0.776938	82.1896	0.753852	43.6145	0.799781	42.6579	0.637027	93.275	0.615901	88.1097	0.558815	84.6174
1.4462	39.5828	0.518232	74.0361	0.658161	78.1252	0.474657	80.7594	1.17634	88.5494			1.83222	45.6981							1.82477	49.0637	1.74839	89.0073					1.09614	36.841	0.953893	34.9102	0.916039	41.9043	0.83777	40.0247	0.907018	37.2604	0.798319	82.6596	0.776623	43.6496	0.821513	42.7102	0.678182	46.8427	0.635688	88.2959	0.577177	85.4241
1.46779	39.6403	0.536136	74.1939	0.677774	78.4966	0.493274	80.7962	1.20057	89.1845			1.86346	45.8546							1.85365	49.1509	1.78083	88.9799					1.11886	36.85	0.97543	34.9367	0.937101	41.9388	0.858168	40.0774	0.928796	37.2676	0.819123	82.5645	0.797548	43.7513	0.843428	42.7441	0.695611	46.8301	0.655542	88.606	0.596924	85.3548
1.48872	39.6793	0.554933	74.1818	0.716092	39.6818	0.5118	80.8965	1.22504	89.1981			1.89443	45.9385							1.88599	49.201	1.80876	89.2069					1.14387	36.9451	0.999062	34.9874	0.960526	42.0191	0.880779	40.0405	0.951207	37.3242	0.84054	83.1399	0.820047	43.7368	0.865722	42.7606	0.715801	46.9005	0.675573	88.5908	0.615708	85.3642
1.51039	39.7061	0.572741	74.3852	0.735586	39.7171	0.530638	80.7576	1.25004	89.2036			1.92533	46.0432							1.9146	49.3229	1.84075	89.2891					1.16671	36.9092	1.02142	35.015	0.982646	42.0265	0.90162	40.0948	0.973187	37.349	0.861326	83.0594	0.841558	43.8356	0.887367	42.7997	0.736253	46.8966	0.695534	88.6532	0.635099	84.9027
1.53123	39.7612	0.591926	74.4424	0.755744	39.7332	0.549308	80.8321	1.27454	89.135			1.95594	46.1259							1.94747	49.4044	1.8686	89.2547					1.19119	36.9357	1.04536	35.0156	1.00703	42.1036	0.923966	40.1846	0.995505	37.4672	0.882038	82.828	0.864636	43.8798	0.908893	42.7719	0.756652	46.9462	0.715475	88.8647	0.654139	85.0007
1.55292	39.7815	0.609619	74.6129	0.775526	39.7201	0.568149	80.9272	1.29875	88.8168			1.98696	46.211							1.97651	49.4368	1.90064	46.3541					1.21361	36.9469	1.06692	35.101	1.02883	42.1234	0.944764	40.206	1.01794	37.4384	0.902953	82.1002	0.88523	43.8822	0.93066	42.8013	0.77718	46.9566	0.735553	88.705	0.673987	85.5458
1.57345	39.8778	0.645735	74.8711	0.794854	39.7607	0.586234	81.1334	1.32259	89.7513			2.01803	46.3469							2.00952	49.4835	1.92762	43.3663					1.23803	37.0219	1.09109	35.1231	1.0522	42.2061	0.967131	40.2629	1.04043	37.4934	0.924456	43.3433	0.907549	43.9153	0.951923	42.8711	0.797291	46.9439	0.755753	88.6373	0.693013	85.6594
1.59562	39.8881	0.665177	74.5018	0.815163	39.8047	0.604725	80.9105	1.34717	88.1913			2.04857	46.4874							2.03851	49.6199	1.96001	43.3529					1.26071	37.0488	1.11286	35.1545	1.07352	42.2632	0.987691	40.2428	1.06225	37.5763	0.945917	43.3827	0.929951	44.0032	0.973237	42.9255	0.817506	47.0157	0.775475	88.9762	0.71222	85.8152
1.61616	39.9378	0.68259	74.7449	0.834799	39.8414	0.623348	81.0892	1.37142	88.912			2.07947	46.6007									1.98797	43.4146					1.2858	37.0746	1.13675	35.1904	1.0969	42.3655	1.01108	40.4163	1.08459	37.644	0.967823	43.4176	0.952377	44.0051	0.995935	42.95	0.837667	47.0504	0.794973	89.2542	0.731439	85.8004
1.63754	39.9755	0.701461	73.8275	0.855029	39.9087	0.64154	80.9779	1.44412	89.3167			2.11052	46.6691									2.0201	43.4945					1.30857	37.078	1.15884	35.2684	1.11828	42.3838	1.03195	40.4117	1.10671	37.7139	0.989126	43.5464	0.97438	44.1162	1.01811	43.0034	0.858599	47.0796	0.815299	89.2399	0.751238	85.7498
1.65817	40.0358	0.719091	75.022	0.874325	39.9447	0.659731	80.9706	1.46812	89.8392			2.14119	46.7615									2.04803	43.5796					1.33311	37.1397	1.18254	35.3073	1.14145	42.4535	1.055	40.5154	1.12881	37.7466	1.0102	43.5596	0.996792	44.0879	1.03961	43.0421	0.879083	47.1601	0.835481	88.2969	0.76992	86.1153
1.67911	40.0797	0.738407	74.669	0.894619	40.0053	0.678045	80.9214	1.49214	90.0339			2.17201	46.9127									2.08003	43.6056					1.3563	37.1346	1.20455	35.2884	1.16296	42.4698	1.07619	40.605	1.15065	37.7747	1.03139	43.5676	1.01865	44.1932	1.06134	43.0854	0.899838	47.1714	0.855212	88.7107	0.789712	86.0278
1.69973	40.1268	0.756008	75.3134	0.914198	40.045	0.69651	81.1095	1.541	45.5132			2.20283	47.014									2.10801	43.6458					1.38078	37.1421	1.22913	35.3798	1.18683	42.5296	1.09932	40.5787	1.173	37.892	1.05428	43.6973	1.0413	44.207	1.08277	43.1203	0.920214	47.2444	0.875348	89.5879	0.808906	86.2324
1.7216	40.1848	0.774823	75.309	0.934062	40.0828	0.715104	81.3335	1.56566	45.5322			2.23375	47.1066									2.14004	43.7234					1.40327	37.1881	1.25071	35.4158	1.2084	42.6203	1.12015	40.6747	1.19505	37.8988	1.07549	43.6891	1.06293	44.3194	1.10454	43.1524	0.940292	47.268	0.8954	89.0961	0.828665	86.1932
1.74259	40.2188	0.82948	40.0463	0.953707	40.1226	0.73379	81.2707	1.59089	45.6086			2.26493	47.179									2.16838	43.8194					1.42658	37.2286	1.27473	35.462	1.23233	42.6879	1.143	40.7419	1.21721	38.033	1.09678	43.7724	1.0855	44.3	1.12686	43.2715	0.960579	47.3364	0.915647	89.7892	0.847106	86.4101
1.76467	40.271	0.849236	40.0651	0.973693	40.1544	0.751644	81.1801	1.61545	45.6637			2.29599	47.3793									2.20049	43.8943					1.44936	37.2879	1.29625	35.4968	1.25366	42.7362	1.16375	40.7205	1.23888	38.0508	1.1177	43.7937	1.10909	44.391	1.14898	43.3385	0.981897	47.3861	0.935865	89.7102	0.86624	86.2282
1.78537	40.3357	0.86771	40.1203	0.993174	40.1621	0.77038	81.3486	1.64011	45.6899			2.32712	47.4683									2.22861	43.9767					1.47417	37.3013	1.32092	35.5303	1.27676	42.7831	1.18626	40.8156	1.26161	38.1676	1.13905	43.8703	1.13151	44.4515	1.17018	43.3562	1.00251	47.428	0.956141	89.692	0.88496	86.5121
1.80737	40.35	0.887489	40.1516	1.01304	40.2002	0.788881	81.1533	1.66472	45.7565			2.35818	47.5791									2.261	43.9803					1.49639	37.3144	1.34275	35.5501	1.29797	42.8736	1.20694	40.8351	1.28316	38.1731	1.15996	43.9245	1.15432	44.5202	1.1915	43.376	1.02304	47.5013	0.976058	90.0243	0.904767	86.5928
1.82812	40.387	0.905087	40.2088	1.03215	40.2101	0.807358	81.2131	1.68997	45.8321			2.38877	47.6982									2.28936	44.1129					1.52021	37.3462	1.3677	35.6418	1.32196	42.904	1.22956	40.9272	1.30558	38.209	1.18166	43.9989	1.17712	44.5825	1.21296	43.444	1.04369	47.5642	0.996366	90.2252	0.923596	86.607
		0.924307	40.2308	1.05214	40.2488	0.825725	81.2167	1.71405	45.8143			2.41988	47.8155									2.32142	44.1853					1.54297	37.373	1.38927	35.7221	1.34382	43.03	1.25017	41.0146	1.32754	38.2824	1.20258	44.0597	1.19868	44.6406	1.235	43.5114	1.06391	47.5852	1.01669	90.3151	0.943192	86.5589
		0.942175	40.2877	1.07143	40.3133	0.84369	81.1709	1.73885	45.9249			2.45045	47.9035									2.34935	44.2592					1.56774	37.4375	1.4133	35.723	1.36712	43.023	1.27233	41.0065	1.35041	38.3138	1.22381	44.1293	1.22101	44.6412	1.25661	43.5444	1.0843	47.6626	1.03766	90.1864	0.961974	86.6532
		0.962208	40.2909	1.09151	40.3417	0.861593	81.2523	1.76319	45.9462			2.48156	48.065									2.38152	44.3899					1.59038	37.4309	1.43476	35.7587	1.38855	43.0817	1.29283	41.0281	1.37214	38.382	1.2445	44.1957	1.24204	44.7743	1.27832	43.6022	1.10441	47.6971	1.05754	90.1296	0.98174	86.9844
		0.980359	40.3436	1.1111	40.3846	0.879753	81.4634	1.78813	46.001			2.51214	48.1908									2.40948	44.4293					1.6148	37.4911	1.45875	35.7903	1.41183	43.1651	1.31471	41.1694	1.39474	38.4522	1.26582	44.2178	1.26398	44.8192	1.29939	43.6311	1.12467	47.7441	1.07849	90.4036	1.00084	86.8105
		0.999943	40.3713	1.13112	40.4272	0.898033	81.4931	1.81261	46.0458													2.44155	44.566					1.63746	37.4983	1.48095	35.85	1.43287	43.2122	1.33501	41.1984	1.41688	38.495	1.28696	44.2687	1.28535	44.949	1.32105	43.733	1.1449	47.773	1.09837	90.5864	1.02014	86.884
		1.01803	40.4205	1.15049	40.4581	0.916545	81.677	1.83745	46.1084													2.46924	44.6199					1.66253	37.5903	1.50486	35.8259	1.45633	43.309	1.3573	41.2624	1.43972	38.6387	1.30836	44.4271	1.30803	44.8885	1.34259	43.7591	1.1654	47.8413	1.12076	90.4115	1.03908	86.8345
		1.03788	40.4646	1.17037	40.4981	0.934603	81.2319	1.86136	46.1493													2.50094	44.6745					1.68538	37.5494	1.52684	35.8779	1.47804	43.3711	1.37797	41.3231	1.46138	38.6191	1.32937	44.4334	1.32906	45.0289	1.36407	43.8182	1.18613	47.8831	1.14092	90.9041	1.05887	86.9155
		1.05562	40.5067	1.18965	40.5292	0.952334	81.3827	1.8864	46.2056													2.52888	44.7528					1.70912	37.5923	1.55085	35.9726	1.50237	43.4408	1.40091	41.3994	1.48434	38.7441	1.35092	44.4617	1.35188	45.0154	1.386	43.8791	1.20635	47.9827	1.16147	91.1287	1.07804	87.2742
		1.07535	40.5407	1.20972	40.5357	0.970329	81.3498	1.91087	46.2694													2.5613	44.7523					1.73149	37.676	1.57291	35.9652	1.52372	43.4767	1.42155	41.5255	1.50704	38.7898	1.37195	44.5741	1.37285	45.1296	1.40699	43.915	1.22678	47.9807	1.18153	90.9227	1.09773	87.4916
		1.09356	40.5944	1.22896	40.604	0.98827	81.5377	1.93635	46.3061													2.58921	44.814					1.75665	37.6638	1.59655	36.0053	1.54735	43.5223	1.44446	41.638	1.52953	38.8887	1.39338	44.6145	1.3958	45.1558	1.42845	43.9942	1.24741	48.03	1.20192	91.2742	1.11635	87.1998
		1.11324	40.6217	1.24921	40.6235	1.00629	81.5755	1.96069	46.3676													2.62139	44.8688									1.56845	43.6329	1.46526	41.6416	1.55158	38.9476	1.41465	44.6811	1.41811	45.2318	1.44975	44.0844	1.2675	48.0775	1.22286	91.0705	1.1364	87.6611
		1.1308	40.7142	1.26877	40.6929	1.02501	80.6247	1.98542	46.4015													2.64966	44.9265									1.59231	43.6658	1.48796	41.643	1.57396	38.9999	1.43612	44.7933	1.4407	45.2969	1.47104	44.0827	1.28816	48.1348	1.24364	91.3496	1.15545	87.6048
		1.15038	40.7343	1.2888	40.7726	1.04314	81.5046	2.00975	46.4316													2.6817	44.9317									1.61389	43.7401	1.50865	41.8517	1.59611	39.0196	1.45701	44.8535	1.46218	45.3697	1.49226	44.1435	1.30931	48.1969	1.26365	91.4507	1.17507	87.7113
		1.16837	40.7798	1.30799	40.7951	1.06149	80.1296	2.03474	46.4576													2.70962	44.9934									1.63687	43.8103	1.53103	41.6704	1.61829	39.1349	1.47841	44.9087	1.48505	45.4023	1.51346	44.2044	1.32969	48.235	1.28445	91.885	1.19391	87.7812
		1.18789	40.8231	1.32772	40.8593	1.07941	81.5643	2.0587	46.5145													2.7421	45.019									1.6582	43.8957	1.55177	41.7951	1.64029	39.1371	1.49926	44.9102	1.51302	45.5121	1.53485	44.2249	1.34979	48.317	1.30451	92.0059	1.21361	88.0436
		1.20567	40.8873	1.34705	40.872	1.0975	81.3127	2.08357	46.5894													2.77008	45.0852											1.57512	41.8726	1.66279	39.2859	1.52035	45.0719	1.53523	45.5741	1.5561	44.302	1.37017	48.386	1.32492	91.9313	1.23264	88.1611
		1.2255	40.9266	1.36731	40.947	1.11559	81.9003	2.10775	46.6319													2.80277	45.1237											1.59549	42.0043	1.68444	39.314	1.54136	45.0472	1.55664	45.6504	1.578	44.3626	1.39044	48.4333	1.3458	91.8548	1.25242	88.2587
		1.24335	40.9853	1.38699	40.9581	1.13396	81.4989	2.13234	46.6644													2.83059	45.1468															1.56334	45.1764	1.57942	45.6988	1.59928	44.4334	1.41106	48.4309	1.36633	92.3433	1.2713	87.8087
		1.26246	41.011	1.40683	41.0029	1.15209	81.9196	2.15641	46.7108													2.86262	45.1923															1.58449	45.2012	1.60106	45.8144	1.62104	44.4787	1.43122	48.5096	1.38682	92.2432	1.29101	88.0479
		1.28044	41.0665	1.42581	40.9898	1.16997	81.5939	2.18109	46.7493																													1.60713	45.3265	1.62344	45.8094	1.64233	44.5317	1.45228	48.5405	1.42747	91.966	1.31017	88.5713
		1.2999	41.1434	1.44603	41.0705	1.18809	81.8158	2.20527	46.8333																													1.62826	45.403	1.64416	45.861	1.66381	44.5784	1.47241	48.6119	1.44819	92.2922	1.33026	88.5699
		1.31779	41.1667	1.46477	41.0938	1.20612	81.147	2.22991	46.8722																													1.65193	45.437					1.49281	48.6898	1.46925	92.6932	1.34933	88.622
		1.3365	41.18	1.48453	41.1258	1.22441	81.5325	2.25397	46.9236																													1.67324	45.5175					1.51296	48.7069	1.48982	92.7811	1.36893	88.7126
		1.35457	41.2757	1.50344	41.1466	1.26014	81.4749	2.27823	46.9678																													1.69483	45.5969					1.53325	48.7671	1.50993	92.8815	1.38787	88.8503
		1.37424	41.2975	1.5234	41.1611	1.31365	38.2719	2.30236	47.0107																													1.71572	45.686					1.55385	48.8142	1.53032	92.4848	1.4076	88.5998
		1.39213	41.355	1.54283	41.2171	1.33211	38.3403	2.3273	47.0784																													1.73706	45.7316					1.57429	48.8547	1.55056	93.1751	1.42617	88.9376
		1.4113	41.407	1.56314	41.2169	1.351	38.3517	2.35173	47.1477																													1.75836	45.8454					1.59449	48.9599	1.57215	92.7726	1.44586	89.0301
		1.4291	41.4498	1.58237	41.2805	1.36936	38.3271	2.37696	47.1772																													1.77998	45.8956					1.6146	49.0127	1.59231	93.496	1.46494	89.4027
		1.44872	41.4842	1.60236	41.3192	1.38784	38.3723	2.40138	47.2217																													1.80118	45.9338					1.63548	49.0761	1.63306	46.518	1.48458	89.3577
		1.46654	41.5359	1.62144	41.4042	1.40639	38.3707	2.42564	47.2801																													1.8231	46.045							1.65138	46.5106	1.50345	89.4991
		1.48619	41.6006	1.64202	41.4137	1.42463	38.4028	2.44986	47.3024																													1.84395	46.1136							1.67137	46.6519	1.52345	89.5685
		1.50411	41.678	1.66104	41.4686	1.44377	38.3845	2.47477	47.37																													1.86637	46.1875							1.69181	46.6911	1.54242	89.7441
		1.52345	41.7062	1.68128	41.4688	1.46282	38.3978	2.49903	47.4418																													1.88736	46.2086							1.71206	46.7838	1.56195	89.8159
		1.54103	41.7635			1.48121	38.4337																															1.909	46.3567							1.73289	46.8308	1.58079	89.9073
		1.56087	41.7902			1.51847	38.4382																																							1.7531	46.9025	1.60035	89.9946
		1.57858	41.8588			1.53728	38.442																																							1.77432	46.9858	1.61927	90.0837
		1.59812	41.921			1.5564	38.4509																																							1.79452	47.0866	1.63897	90.3688
		1.61576	41.9522			1.5748	38.4497																																							1.81526	47.1039	1.6574	90.5957
		1.6352	41.9817			1.59379	38.4872																																							1.83614	47.2061	1.67693	90.4213
		1.65275	42.0475			1.61214	38.4686																																									1.69569	90.5817
		1.67185	42.0938			1.631	38.4931																																									1.715	90.9302
		1.68928	42.1182			1.64987	38.4955																																									1.73384	90.9949
		1.70886	42.2166			1.66976	38.5003																																									1.75363	90.8275
		1.72638	42.2461			1.68818	38.5186																																									1.77252	91.0077
		1.74578	42.3192			1.70784	38.5095																																									1.79204	90.7403
		1.7639	42.3582			1.72619	38.5268																																									1.81096	91.3122
		1.78332	42.4189			1.74524	38.5306																																									1.83019	91.3352
						1.76377	38.5874																																									1.84952	91.5341
						1.78261	38.5736																																									1.86876	91.66
						1.80144	38.5848																																									1.88752	91.8165
						1.82012	38.5968																																									1.90695	91.9059
						1.83865	38.6088																																									1.92548	91.9489
						1.85764	38.6429																																									1.94468	92.1699
						1.87593	38.6387																																									1.96366	92.1707
						1.89508	38.6481																																									1.98336	92.0146
						1.91355	38.6767																																									2.00222	92.4711
						1.93248	38.6743																																									2.02164	92.2998
						1.95108	38.684																																									2.04063	92.6239
						1.96999	38.7134																																									2.06033	92.8274
						1.98832	38.7347																																									2.0986	93.2773
						2.00733	38.7652																																									2.11765	92.733
						2.02556	38.7397																																									2.13735	93.0748
						2.04548	38.7531																																									2.15659	93.508
						2.06399	38.7812																																									2.17618	93.756
						2.08313	38.7987																																									2.1951	93.8377
						2.10262	38.8089																																									2.21481	93.9291
						2.12192	38.8067																																									2.23397	93.8382
						2.14056	38.8158																																									2.25363	94.3091
						2.15961	38.8276																																									2.27272	94.2435
						2.17804	38.8798																																									2.29232	93.6761
						2.19711	38.8665																																									2.31141	94.477
						2.21554	38.9036																																									2.33185	94.2051
						2.2344	38.9068																																									2.35099	94.7798
						2.25305	38.9503																																									2.37097	94.9985
																																																2.38975	95.1115
																																																2.40921	95.1631
																																																2.42786	95.0777
																																																2.4475	95.5211
																																																2.46635	95.4844
																																																2.4858	95.4963
																																																2.50469	95.9059
																																																2.52432	95.8176
																																																2.5428	96.0775
																																																2.56245	96.407
																																																2.58096	96.3496
																																																2.60001	96.3961
																																																2.61901	96.6325
																																																2.63832	96.4235
																																																2.65736	96.9151
																																																2.67661	96.9732
																																																2.69531	97.1091
																																																2.71461	97.1161
																																																2.7336	97.2242
																																																2.75308	97.5415
																																																2.77208	97.6922
																																																2.79157	97.7544
																																																2.81059	97.9004
																																																2.84923	98.1456
																																																2.86862	98.3316
																																																2.88727	97.7416
																																																2.90746	98.5835
																																																2.92597	98.3908
																																																2.94577	98.357
																																																2.98393	97.7918
																																																3.00276	98.7959
																																																3.02248	99.4186
																																																3.04156	98.1447
																																																3.06102	99.685
																																																3.09911	53.1599
																																																3.11806	53.2428
																																																3.13767	53.3177
																																																3.15661	53.4189
																																																3.17657	53.4868
																																																3.19565	53.5864
																																																3.21519	53.685
																																																3.23404	53.7517
																																																3.25357	53.8117
																																																3.27261	53.8874
																																																3.29235	53.9948
																																																3.3113	54.032
																																																3.3307	54.0942
																																																3.34947	54.2061
																																																3.36896	54.2431
																																																3.38852	54.3772
																																																3.4083	54.4054
																																																3.42765	54.5274
																																																3.44727	54.5701
																																																3.46611	54.6599
																																																3.4859	54.7461
																																																3.50475	54.8178
																																																3.52424	54.9274
																																																3.54284	54.978
																																																3.56211	55.0483
																																																3.58088	55.1483
																																																3.60029	55.1646
																																																3.61904	55.291
																																																3.63863	55.3248
																																																3.65734	55.4331
																																																3.67677	55.5055
																																																3.69566	55.6051
																																																3.71493	55.6682
																																																3.73373	55.7523
																																																3.75331	55.8026
																																																3.77215	55.8953
																																																3.79165	55.95
																																																3.81046	56.0823
																																																3.82985	56.1352
																																																3.84872	56.1863
																																																3.86816	56.2611
																																																3.88692	56.3893
																																																3.90647	56.4421
																																																3.92532	56.5546
																																																3.94492	56.5833
																																																3.96373	56.6612
																																																3.98319	56.7498
																																																4.00209	56.8164
																																																4.02187	56.9441
																																																4.04085	57.0049
																																																4.06027	57.0358






































[truncated: 310 more columns]
